# Supplementary material
Source: PubMed Central journal article supplement (PMC5087867)
Supplement: 10.1194_M064956_jlr.M064956-1.pdf [file 10.1194_M064956_jlr.M064956-1.pdf]

**Supplemental tables.**

Supplemental Table S1. Body and tissue weight and plasma lipids and liver TGs.

|                      | FCO                     |                         | SO                       |                        | CO                      |                         |
|----------------------|-------------------------|-------------------------|--------------------------|------------------------|-------------------------|-------------------------|
|                      | WT                      | HET                     | WT                       | HET                    | WT                      | HET                     |
| Body Weight Gain (g) | 11.9±4.2                | 12.6±3.6                | 13.2±3.4                 | 12.1±3.0               | 15.5±4.3                | 12.7±2.3                |
| Liver (g)            | 1.29±0.17               | 1.35±0.30               | 1.31±0.26                | 1.20±0.25              | 1.44±0.24               | 1.43±0.11               |
| Brain (mg)           | 443±8 <sup>ab</sup>     | 437±12 <sup>ab</sup>    | 437±12 <sup>ab</sup>     | 451±27 <sup>a</sup>    | 427±17 <sup>b</sup>     | 441±12 <sup>ab</sup>    |
| Plasma TC (mg/dL)    | 90.3±24.8 <sup>ab</sup> | 93.1±31.2 <sup>ab</sup> | 108.2±43.6 <sup>ab</sup> | 73.3±50.1 <sup>b</sup> | 99.4±33.7 <sup>ab</sup> | 117.9±16.7 <sup>a</sup> |
| Plasma TG (mg/dL)    | 60.0±20.3               | 60.1±22.2               | 49.7±21.8                | 42.5±28.0              | 58.8±29.9               | 57.8±12.9               |
| Liver TG (mg/g)      | 15.7±6.0                | 19.8±6.3                | 17.7±6.9                 | 19.8±6.9               | 18.5±7.9                | 18.3±4.7                |

Values are means ± SD (n=6); neither diet nor genotype effect was observed; data that do not share same superscript letter(s) within a row are significantly different,  $p < 0.05$  by LSD multiple comparison; TC, total cholesterol.

Supplemental Table S2. Polyunsaturated fatty acid composition of liver triglycerides (wt. %)

| Fatty acid | FCO                     |                        | SO                      |                          | CO                       |                          | p-value |      |             |
|------------|-------------------------|------------------------|-------------------------|--------------------------|--------------------------|--------------------------|---------|------|-------------|
|            | WT                      | HET                    | WT                      | HET                      | WT                       | HET                      | Diet    | Gene | Gene x Diet |
| 18:2 n-6   | 8.89+1.98 <sup>c</sup>  | 7.94+1.28 <sup>c</sup> | 21.61+4.83 <sup>a</sup> | 21.67+2.37 <sup>a</sup>  | 16.31+3.23 <sup>b</sup>  | 19.91+1.91 <sup>a</sup>  | ***     |      |             |
| 18:3 n-6   | 0.08+0.03 <sup>bc</sup> | 0.05+0.02 <sup>c</sup> | 0.34+0.13 <sup>a</sup>  | 0.14+0.05 <sup>b</sup>   | 0.35+0.1 <sup>a</sup>    | 0.16+0.06 <sup>b</sup>   | ***     | ***  | *           |
| 20:2 n-6   | 0.14+0.03 <sup>c</sup>  | 0.11+0.08 <sup>c</sup> | 0.36+0.2 <sup>b</sup>   | 0.53+0.25 <sup>a</sup>   | 0.34+0.06 <sup>b</sup>   | 0.49+0.1 <sup>ab</sup>   | ***     | *    |             |
| 20:3 n-6   | 0.21+0.04 <sup>cd</sup> | 0.12+0.06 <sup>d</sup> | 0.7+0.46 <sup>a</sup>   | 0.45+0.28 <sup>abc</sup> | 0.49+0.08 <sup>ab</sup>  | 0.27+0.04 <sup>bcd</sup> | ***     | *    |             |
| 20:4 n-6   | 0.19+0.08 <sup>c</sup>  | 0.12+0.06 <sup>c</sup> | 0.86+0.48 <sup>ab</sup> | 0.72+0.46 <sup>ab</sup>  | 0.97+0.17 <sup>a</sup>   | 0.63+0.06 <sup>b</sup>   | ***     |      |             |
| 22:4 n-6   | 0.03+0.01 <sup>b</sup>  | 0.03+0.02 <sup>b</sup> | 0.26+0.25 <sup>a</sup>  | 0.31+0.28 <sup>a</sup>   | 0.25+0.05 <sup>a</sup>   | 0.19+0.02 <sup>ab</sup>  | **      |      |             |
| 22:5 n-6   | 0.01+0.01 <sup>b</sup>  | 0.01+0.01 <sup>b</sup> | 0.17+0.27 <sup>ab</sup> | 0.24+0.28 <sup>a</sup>   | 0.27+0.08 <sup>a</sup>   | 0.23+0.06 <sup>a</sup>   | **      |      |             |
| 18:3 n-3   | 3.81+0.61 <sup>a</sup>  | 3.94+1.4 <sup>a</sup>  | 1.48+0.45 <sup>b</sup>  | 1.53+0.55 <sup>b</sup>   | 0.12+0.09 <sup>c</sup>   | 0.19+0.02 <sup>c</sup>   | ***     |      |             |
| 20:3 n-3   | 0.1+0.02 <sup>b</sup>   | 0.12+0.02 <sup>a</sup> | 0.03+0 <sup>d</sup>     | 0.05+0.01 <sup>c</sup>   | n. d.                    | n. d.                    | ***     | **   | *           |
| 20:5 n-3   | 1.15+0.19 <sup>a</sup>  | 0.9+0.26 <sup>b</sup>  | 0.71+0.14 <sup>c</sup>  | 0.57+0.05 <sup>cd</sup>  | 0.44+0.03 <sup>d</sup>   | 0.41+0.04 <sup>d</sup>   | ***     | *    |             |
| 22:5 n-3   | 0.77+0.25 <sup>a</sup>  | 0.61+0.25 <sup>a</sup> | 0.39+0.14 <sup>b</sup>  | 0.31+0.13 <sup>b</sup>   | 0.03+0.01 <sup>c</sup>   | 0.02+0.01 <sup>c</sup>   | ***     |      |             |
| 22:6 n-3   | 2.24+1 <sup>a</sup>     | 1.8+1.01 <sup>a</sup>  | 1.57+1.02 <sup>a</sup>  | 1.53+1.13 <sup>a</sup>   | 0.12+0.03 <sup>b</sup>   | 0.08+0.03 <sup>b</sup>   | ***     |      |             |
| Total n-6  | 9.56+2.15 <sup>c</sup>  | 8.39+1.37 <sup>c</sup> | 24.3+5.46 <sup>a</sup>  | 24.06+3.12 <sup>a</sup>  | 18.97+3.48 <sup>b</sup>  | 21.88+2.1 <sup>ab</sup>  | ***     |      |             |
| Total n-3  | 6.91+1.77 <sup>a</sup>  | 6.47+1.75 <sup>a</sup> | 3.47+1.21 <sup>b</sup>  | 3.41+1.02 <sup>b</sup>   | 0.27+0.13 <sup>c</sup>   | 0.3+0.03 <sup>c</sup>    | ***     |      |             |
| n-6/n-3    | 1.4+0.19 <sup>b</sup>   | 1.33+0.16 <sup>b</sup> | 7.34+1.27 <sup>b</sup>  | 7.36+1.29 <sup>b</sup>   | 78.97+24.23 <sup>a</sup> | 74.73+11.6 <sup>a</sup>  | ***     |      |             |
| AA/DHA     | 0.09+0.02 <sup>b</sup>  | 0.07+0.01 <sup>b</sup> | 0.59+0.1 <sup>b</sup>   | 0.51+0.1 <sup>b</sup>    | 8.47+1.99 <sup>a</sup>   | 8.36+2.63 <sup>a</sup>   | ***     |      |             |

Values are means  $\pm$  SD (n=6); data that do not share same superscript letter(s) within a row are significantly different,  $p < 0.05$  by LSD multiple comparison. Effects of diet, gene and their interaction were calculated by two-way ANOVA; \*  $p < 0.05$ , \*\*  $p < 0.01$  and \*\*\*  $p < 0.001$ . n. d.: not detected.

Supplemental Table S3. Polyunsaturated fatty acid composition of liver cholesteryl ester (wt. %)

| Fatty acid | FCO                     |                         | SO                      |                          | CO                       |                         | p-value |      |             |
|------------|-------------------------|-------------------------|-------------------------|--------------------------|--------------------------|-------------------------|---------|------|-------------|
|            | WT                      | HET                     | WT                      | HET                      | WT                       | HET                     | Diet    | Gene | Gene x Diet |
| 18:2 n-6   | 4.55+0.36 <sup>c</sup>  | 4.9+1.48 <sup>c</sup>   | 9.8+1.44 <sup>a</sup>   | 10.72+1.48 <sup>a</sup>  | 7.45+1.35 <sup>b</sup>   | 9.67+0.94 <sup>a</sup>  | ***     | **   |             |
| 18:3 n-6   | n. d.                   | n. d.                   | n. d.                   | n. d.                    | n. d.                    | n. d.                   |         |      |             |
| 20:2 n-6   | 0.17+0.35               | 0.4+0.88                | 0.1+0.13                | 0.5+0.94                 | 0.06+0.02                | 0.11+0.06               |         |      |             |
| 20:3 n-6   | 0.09+0.03 <sup>bc</sup> | 0.05+0.04 <sup>bc</sup> | 0.19+0.14 <sup>a</sup>  | 0.08+0.07 <sup>b</sup>   | 0.13+0.08 <sup>abc</sup> | 0.08+0.05 <sup>b</sup>  |         | *    |             |
| 20:4 n-6   | 0.55+0.08 <sup>d</sup>  | 0.38+0.15 <sup>d</sup>  | 1.85+0.41 <sup>b</sup>  | 1.03+0.33 <sup>c</sup>   | 2.76+0.55 <sup>a</sup>   | 2.13+0.38 <sup>b</sup>  | ***     | ***  |             |
| 22:4 n-6   | 0.01+0.01 <sup>c</sup>  | 0.03+0.03 <sup>bc</sup> | 0.18+0.19 <sup>a</sup>  | 0.08+0.06 <sup>abc</sup> | 0.13+0.06 <sup>ab</sup>  | 0.13+0.11 <sup>ab</sup> | *       |      |             |
| 22:5 n-6   | 0.08+0.03 <sup>de</sup> | 0.07+0.04 <sup>e</sup>  | 0.14+0.05 <sup>bc</sup> | 0.13+0.05 <sup>cd</sup>  | 0.24+0.06 <sup>a</sup>   | 0.19+0.04 <sup>ab</sup> | ***     |      |             |
| 18:3 n-3   | 2.03+0.28 <sup>a</sup>  | 1.9+0.56 <sup>a</sup>   | 0.87+0.23 <sup>b</sup>  | 1.05+0.26 <sup>b</sup>   | 0.1+0.03 <sup>c</sup>    | 0.12+0.06 <sup>c</sup>  | ***     |      |             |
| 20:3 n-3   | n. d.                   | n. d.                   | n. d.                   | n. d.                    | n. d.                    | n. d.                   |         |      |             |
| 20:5 n-3   | 0.97+0.41 <sup>a</sup>  | 0.97+0.62 <sup>a</sup>  | 0.3+0.08 <sup>b</sup>   | 0.61+0.58 <sup>ab</sup>  | 0.22+0.05 <sup>b</sup>   | 0.24+0.06 <sup>b</sup>  | ***     |      |             |
| 22:5 n-3   | n. d.                   | n. d.                   | n. d.                   | n. d.                    | n. d.                    | n. d.                   |         |      |             |
| 22:6 n-3   | 1.48+0.24 <sup>a</sup>  | 1.27+0.36 <sup>ab</sup> | 1.09+0.17 <sup>bc</sup> | 0.88+0.14 <sup>c</sup>   | 0.36+0.04 <sup>d</sup>   | 0.3+0.08 <sup>d</sup>   | ***     | *    |             |
| Total n-6  | 5.45+0.23 <sup>c</sup>  | 5.82+1.42 <sup>c</sup>  | 12.27+1.6 <sup>a</sup>  | 12.54+1.14 <sup>a</sup>  | 10.77+1.5 <sup>b</sup>   | 12.31+1.07 <sup>a</sup> | ***     |      |             |
| Total n-3  | 4.48+0.43 <sup>a</sup>  | 4.14+0.85 <sup>a</sup>  | 2.26+0.28 <sup>b</sup>  | 2.54+0.5 <sup>b</sup>    | 0.68+0.07 <sup>c</sup>   | 0.66+0.14 <sup>c</sup>  | ***     |      |             |
| n-6:n-3    | 1.22+0.14 <sup>d</sup>  | 1.42+0.25 <sup>d</sup>  | 5.44+0.48 <sup>c</sup>  | 5.05+0.76 <sup>c</sup>   | 15.79+1.49 <sup>b</sup>  | 19.24+3.53 <sup>a</sup> | ***     |      | *           |
| AA/DHA     | 0.37+0.04 <sup>c</sup>  | 0.31+0.11 <sup>c</sup>  | 1.74+0.46 <sup>b</sup>  | 1.15+0.25 <sup>bc</sup>  | 7.71+1.07 <sup>a</sup>   | 7.39+1.31 <sup>a</sup>  | ***     |      |             |

Values are means  $\pm$  SD (n=6); data that do not share same superscript letter(s) within a row are significantly different,  $p < 0.05$  by LSD multiple comparison. Effects of diet, gene and their interaction were calculated by two-way ANOVA; \*  $p < 0.05$ , \*\*  $p < 0.01$  and \*\*\*  $p < 0.001$ . n. d.: not detected.
